# Supplementary material
Source: MDPI journal article supplement (https://www.mdpi.com/1999-4907/13/12/1986)
Supplement: s1 [file s1]

# Assessing Resilience Components in Maritime Pine Provenances Grown in Common Gardens

Concetta Lisella <sup>1,\*</sup>, Serena Antonucci <sup>2</sup>, Giovanni Santopuoli <sup>2</sup>, Marco Marchetti <sup>1</sup> and Roberto Tognetti <sup>2</sup>

<sup>1</sup> Dipartimento Bioscienze e Territorio, Università degli Studi del Molise, Contrada Fonte Lappone, 86090 Pesche, Italy

<sup>2</sup> Dipartimento Agricoltura, Ambiente e Alimenti, Università degli Studi del Molise, Via Francesco De Sanctis, 86100 Campobasso, Italy

\* Correspondence: c.lisella@studenti.unimol.it (C.L.)

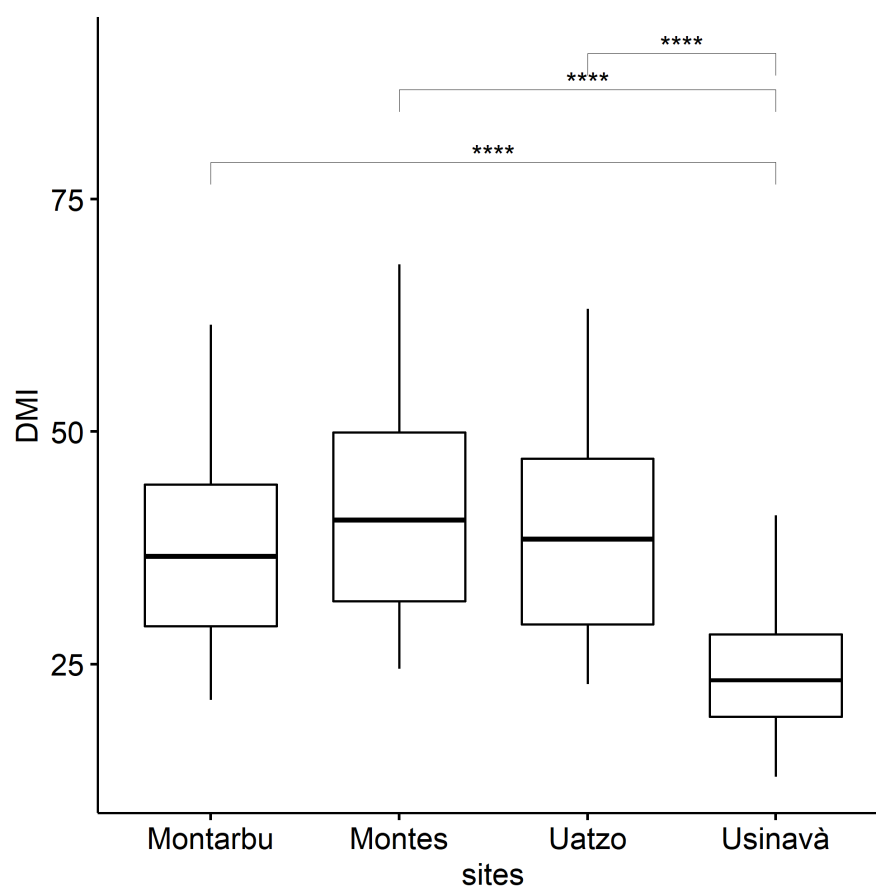

1

**Figure S1.** De Martonne index in the period 1988–2018 in each site. The lines indicate which one sites differ among each other and the asterisk the significance level: \*\*\*  $p < 0.001$ ; \*\*  $p < 0.01$ ; \*  $p < 0.05$ .

**Table S1.** Kruskal wallis results for the BAI among the sites. among provenances and among provenances in the different sites.

| Source              | Chi-quared | Df | p-value      |
|---------------------|------------|----|--------------|
| Sites               | 36.162     | 3  | 6.922e-08*** |
| Provenances         | 7.121      | 4  | 0.1296       |
| Sites × Provenances | 128.24     | 19 | < 2.2e-16*** |

**Table S2.** Conover test results for the BAI in the different sites.

| source            | mean rank diff | pval    |
|-------------------|----------------|---------|
| Montes-Montarbu   | 114.7097       | 0***    |
| Uatzo-Montarbu    | 22.471         | 0.5133  |
| Usinavà -Montarbu | 34.471         | 0.2462  |
| Uatzo-Montes      | -92.2387       | 0***    |
| Usinavà -Montes   | -80.2387       | 2e-04** |
| Usinavà -Uatzo    | 12             | 0.5445  |

**Table S3.** Conover test results for the BAI of provenances in different sites (P × S).

| source                              | mean rank diff | pval    |
|-------------------------------------|----------------|---------|
| Corsica Montes-Corsica Montarbu     | 208.2258       | 1e-04** |
| Corsica Uatzo-Corsica Montarbu      | 184.129        | 0.0015* |
| Corsica Usinavà -Corsica Montarbu   | 88.3548        | 1       |
| Limbara Montarbu-Corsica Montarbu   | -3.9677        | 1       |
| Limbara Montes-Corsica Montarbu     | 160.6129       | 0.0159* |
| Limbara Uatzo-Corsica Montarbu      | 68.3871        | 1       |
| Limbara Usinavà -Corsica Montarbu   | 200.6774       | 2e-04** |
| Portugual Montarbu-Corsica Montarbu | 48.6452        | 1       |
| Portugual Montes-Corsica Montarbu   | 127.3548       | 0.2615  |
| Portugual Uatzo-Corsica Montarbu    | 174.9032       | 0.0039* |
| Portugual Usinavà -Corsica Montarbu | 71.3226        | 1       |
| Telti Montarbu-Corsica Montarbu     | 29.9677        | 1       |
| Telti Montes-Corsica Montarbu       | 217.0323       | 0***    |
| Telti Uatzo-Corsica Montarbu        | -1.129         | 1       |
| Telti Usinavà -Corsica Montarbu     | 62.6129        | 1       |
| Tuscany Montarbu-Corsica Montarbu   | 189.5806       | 8e-04** |
| Tuscany Montes-Corsica Montarbu     | 124.5484       | 0.317   |
| Tuscany Uatzo-Corsica Montarbu      | -49.7097       | 1       |
| Tuscany Usinavà -Corsica Montarbu   | 13.6129        | 1       |
| Corsica Uatzo-Corsica Montes        | -24.0968       | 1       |
| Corsica Usinavà -Corsica Montes     | -119.871       | 0.4416  |
| Limbara Montarbu-Corsica Montes     | -212.1935      | 1e-04** |
| Limbara Montes-Corsica Montes       | -47.6129       | 1       |
| Limbara Uatzo-Corsica Montes        | -139.8387      | 0.1004  |
| Limbara Usinavà -Corsica Montes     | -7.5484        | 1       |
| Portugual Montarbu-Corsica Montes   | -159.5806      | 0.0175* |
| Portugual Montes-Corsica Montes     | -80.871        | 1       |
| Portugual Uatzo-Corsica Montes      | -33.3226       | 1       |
| Portugual Usinavà -Corsica Montes   | -136.9032      | 0.1266  |
| Telti Montarbu-Corsica Montes       | -178.2581      | 0.0028* |
| Telti Montes-Corsica Montes         | 8.8065         | 1       |

---

|                                    |           |         |
|------------------------------------|-----------|---------|
| Telti Uatzo-Corsica Montes         | -209.3548 | 1e-04** |
| Telti Usinavà -Corsica Montes      | -145.6129 | 0.0615  |
| Tuscany Montarbu-Corsica Montes    | -18.6452  | 1       |
| Tuscany Montes-Corsica Montes      | -83.6774  | 1       |
| Tuscany Uatzo-Corsica Montes       | -257.9355 | 0***    |
| Tuscany Usinavà -Corsica Montes    | -194.6129 | 5e-04** |
| Corsica Usinavà -Corsica Uatzo     | -95.7742  | 1       |
| Limbara Montarbu-Corsica Uatzo     | -188.0968 | 0.001** |
| Limbara Montes-Corsica Uatzo       | -23.5161  | 1       |
| Limbara Uatzo-Corsica Uatzo        | -115.7419 | 0.5882  |
| Limbara Usinavà -Corsica Uatzo     | 16.5484   | 1       |
| Portugual Montarbu-Corsica Uatzo   | -135.4839 | 0.1419  |
| Portugual Montes-Corsica Uatzo     | -56.7742  | 1       |
| Portugual Uatzo-Corsica Uatzo      | -9.2258   | 1       |
| Portugual Usinavà -Corsica Uatzo   | -112.8065 | 0.718   |
| Telti Montarbu-Corsica Uatzo       | -154.1613 | 0.0289* |
| Telti Montes-Corsica Uatzo         | 32.9032   | 1       |
| Telti Uatzo-Corsica Uatzo          | -185.2581 | 0.0013* |
| Telti Usinavà -Corsica Uatzo       | -121.5161 | 0.3987  |
| Tuscany Montarbu-Corsica Uatzo     | 5.4516    | 1       |
| Tuscany Montes-Corsica Uatzo       | -59.5806  | 1       |
| Tuscany Uatzo-Corsica Uatzo        | -233.8387 | 0***    |
| Tuscany Usinavà -Corsica Uatzo     | -170.5161 | 0.0061* |
| Limbara Montarbu-Corsica Usinavà   | -92.3226  | 1       |
| Limbara Montes-Corsica Usinavà     | 72.2581   | 1       |
| Limbara Uatzo-Corsica Usinavà      | -19.9677  | 1       |
| Limbara Usinavà -Corsica Usinavà   | 112.3226  | 0.7372  |
| Portugual Montarbu-Corsica Usinavà | -39.7097  | 1       |
| Portugual Montes-Corsica Usinavà   | 39        | 1       |
| Portugual Uatzo-Corsica Usinavà    | 86.5484   | 1       |
| Portugual Usinavà -Corsica Usinavà | -17.0323  | 1       |
| Telti Montarbu-Corsica Usinavà     | -58.3871  | 1       |
| Telti Montes-Corsica Usinavà       | 128.6774  | 0.2405  |
| Telti Uatzo-Corsica Usinavà        | -89.4839  | 1       |
| Telti Usinavà -Corsica Usinavà     | -25.7419  | 1       |
| Tuscany Montarbu-Corsica Usinavà   | 101.2258  | 1       |
| Tuscany Montes-Corsica Usinavà     | 36.1935   | 1       |
| Tuscany Uatzo-Corsica Usinavà      | -138.0645 | 0.1163  |
| Tuscany Usinavà -Corsica Usinavà   | -74.7419  | 1       |
| Limbara Montes-Limbara Montarbu    | 164.5806  | 0.011*  |
| Limbara Uatzo-Limbara Montarbu     | 72.3548   | 1       |
| Limbara Usinavà -Limbara Montarbu  | 204.6452  | 2e-04** |

---

---

|                                     |           |         |
|-------------------------------------|-----------|---------|
| Portugual Montarbu-Limbara Montarbu | 52.6129   | 1       |
| Portugual Montes-Limbara Montarbu   | 131.3226  | 0.1981  |
| Portugual Uatzo-Limbara Montarbu    | 178.871   | 0.0027* |
| Portugual Usinavà -Limbara Montarbu | 75.2903   | 1       |
| Telti Montarbu-Limbara Montarbu     | 33.9355   | 1       |
| Telti Montes-Limbara Montarbu       | 221       | 0***    |
| Telti Uatzo-Limbara Montarbu        | 2.8387    | 1       |
| Telti Usinavà -Limbara Montarbu     | 66.5806   | 1       |
| Tuscany Montarbu-Limbara Montarbu   | 193.5484  | 5e-04** |
| Tuscany Montes-Limbara Montarbu     | 128.5161  | 0.2418  |
| Tuscany Uatzo-Limbara Montarbu      | -45.7419  | 1       |
| Tuscany Usinavà -Limbara Montarbu   | 17.5806   | 1       |
| Limbara Uatzo-Limbara Montes        | -92.2258  | 1       |
| Limbara Usinavà -Limbara Montes     | 40.0645   | 1       |
| Portugual Montarbu-Limbara Montes   | -111.9677 | 0.7372  |
| Portugual Montes-Limbara Montes     | -33.2581  | 1       |
| Portugual Uatzo-Limbara Montes      | 14.2903   | 1       |
| Portugual Usinavà -Limbara Montes   | -89.2903  | 1       |
| Telti Montarbu-Limbara Montes       | -130.6452 | 0.2079  |
| Telti Montes-Limbara Montes         | 56.4194   | 1       |
| Telti Uatzo-Limbara Montes          | -161.7419 | 0.0145* |
| Telti Usinavà -Limbara Montes       | -98       | 1       |
| Tuscany Montarbu-Limbara Montes     | 28.9677   | 1       |
| Tuscany Montes-Limbara Montes       | -36.0645  | 1       |
| Tuscany Uatzo-Limbara Montes        | -210.3226 | 1e-04** |
| Tuscany Usinavà -Limbara Montes     | -147      | 0.055   |
| Limbara Usinavà -Limbara Uatzo      | 132.2903  | 0.1842  |
| Portugual Montarbu-Limbara Uatzo    | -19.7419  | 1       |
| Portugual Montes-Limbara Uatzo      | 58.9677   | 1       |
| Portugual Uatzo-Limbara Uatzo       | 106.5161  | 1       |
| Portugual Usinavà -Limbara Uatzo    | 2.9355    | 1       |
| Telti Montarbu-Limbara Uatzo        | -38.4194  | 1       |
| Telti Montes-Limbara Uatzo          | 148.6452  | 0.0477* |
| Telti Uatzo-Limbara Uatzo           | -69.5161  | 1       |
| Telti Usinavà -Limbara Uatzo        | -5.7742   | 1       |
| Tuscany Montarbu-Limbara Uatzo      | 121.1935  | 0.4055  |
| Tuscany Montes-Limbara Uatzo        | 56.1613   | 1       |
| Tuscany Uatzo-Limbara Uatzo         | -118.0968 | 0.497   |
| Tuscany Usinavà -Limbara Uatzo      | -54.7742  | 1       |
| Portugual Montarbu-Limbara Usinavà  | -152.0323 | 0.0351* |
| Portugual Montes-Limbara Usinavà    | -73.3226  | 1       |
| Portugual Uatzo-Limbara Usinavà     | -25.7742  | 1       |

---

---

|                                       |           |         |
|---------------------------------------|-----------|---------|
| Portugual Usinavà -Limbara Usinavà    | -129.3548 | 0.2293  |
| Telti Montarbu-Limbara Usinavà        | -170.7097 | 0.006*  |
| Telti Montes-Limbara Usinavà          | 16.3548   | 1       |
| Telti Uatzo-Limbara Usinavà           | -201.8065 | 2e-04** |
| Telti Usinavà -Limbara Usinavà        | -138.0645 | 0.1163  |
| Tuscany Montarbu-Limbara Usinavà      | -11.0968  | 1       |
| Tuscany Montes-Limbara Usinavà        | -76.129   | 1       |
| Tuscany Uatzo-Limbara Usinavà         | -250.3871 | 0***    |
| Tuscany Usinavà -Limbara Usinavà      | -187.0645 | 0.0011* |
| Portugual Montes-Portugual Montarbu   | 78.7097   | 1       |
| Portugual Uatzo-Portugual Montarbu    | 126.2581  | 0.2811  |
| Portugual Usinavà -Portugual Montarbu | 22.6774   | 1       |
| Telti Montarbu-Portugual Montarbu     | -18.6774  | 1       |
| Telti Montes-Portugual Montarbu       | 168.3871  | 0.0075* |
| Telti Uatzo-Portugual Montarbu        | -49.7742  | 1       |
| Telti Usinavà -Portugual Montarbu     | 13.9677   | 1       |
| Tuscany Montarbu-Portugual Montarbu   | 140.9355  | 0.0919  |
| Tuscany Montes-Portugual Montarbu     | 75.9032   | 1       |
| Tuscany Uatzo-Portugual Montarbu      | -98.3548  | 1       |
| Tuscany Usinavà -Portugual Montarbu   | -35.0323  | 1       |
| Portugual Uatzo-Portugual Montes      | 47.5484   | 1       |
| Portugual Usinavà -Portugual Montes   | -56.0323  | 1       |
| Telti Montarbu-Portugual Montes       | -97.3871  | 1       |
| Telti Montes-Portugual Montes         | 89.6774   | 1       |
| Telti Uatzo-Portugual Montes          | -128.4839 | 0.2418  |
| Telti Usinavà -Portugual Montes       | -64.7419  | 1       |
| Tuscany Montarbu-Portugual Montes     | 62.2258   | 1       |
| Tuscany Montes-Portugual Montes       | -2.8065   | 1       |
| Tuscany Uatzo-Portugual Montes        | -177.0645 | 0.0032* |
| Tuscany Usinavà -Portugual Montes     | -113.7419 | 0.6763  |
| Portugual Usinavà -Portugual Uatzo    | -103.5806 | 1       |
| Telti Montarbu-Portugual Uatzo        | -144.9355 | 0.0649  |
| Telti Montes-Portugual Uatzo          | 42.129    | 1       |
| Telti Uatzo-Portugual Uatzo           | -176.0323 | 0.0035* |
| Telti Usinavà -Portugual Uatzo        | -112.2903 | 0.7372  |
| Tuscany Montarbu-Portugual Uatzo      | 14.6774   | 1       |
| Tuscany Montes-Portugual Uatzo        | -50.3548  | 1       |
| Tuscany Uatzo-Portugual Uatzo         | -224.6129 | 0***    |
| Tuscany Usinavà -Portugual Uatzo      | -161.2903 | 0.015*  |
| Telti Montarbu-Portugual Usinavà      | -41.3548  | 1       |
| Telti Montes-Portugual Usinavà        | 145.7097  | 0.0614  |
| Telti Uatzo-Portugual Usinavà         | -72.4516  | 1       |

---

|                                    |           |         |
|------------------------------------|-----------|---------|
| Telti Usinavà -Portugual Usinavà   | -8.7097   | 1       |
| Tuscany Montarbu-Portugual Usinavà | 118.2581  | 0.4952  |
| Tuscany Montes-Portugual Usinavà   | 53.2258   | 1       |
| Tuscany Uatzo-Portugual Usinavà    | -121.0323 | 0.4072  |
| Tuscany Usinavà -Portugual Usinavà | -57.7097  | 1       |
| Telti Montes-Telti Montarbu        | 187.0645  | 0.0011* |
| Telti Uatzo-Telti Montarbu         | -31.0968  | 1       |
| Telti Usinavà -Telti Montarbu      | 32.6452   | 1       |
| Tuscany Montarbu-Telti Montarbu    | 159.6129  | 0.0175* |
| Tuscany Montes-Telti Montarbu      | 94.5806   | 1       |
| Tuscany Uatzo-Telti Montarbu       | -79.6774  | 1       |
| Tuscany Usinavà -Telti Montarbu    | -16.3548  | 1       |
| Telti Uatzo-Telti Montes           | -218.1613 | 0***    |
| Telti Usinavà -Telti Montes        | -154.4194 | 0.0284* |
| Tuscany Montarbu-Telti Montes      | -27.4516  | 1       |
| Tuscany Montes-Telti Montes        | -92.4839  | 1       |
| Tuscany Uatzo-Telti Montes         | -266.7419 | 0***    |
| Tuscany Usinavà -Telti Montes      | -203.4194 | 2e-04** |
| Telti Usinavà -Telti Uatzo         | 63.7419   | 1       |
| Tuscany Montarbu-Telti Uatzo       | 190.7097  | 8e-04** |
| Tuscany Montes-Telti Uatzo         | 125.6774  | 0.2921  |
| Tuscany Uatzo-Telti Uatzo          | -48.5806  | 1       |
| Tuscany Usinavà -Telti Uatzo       | 14.7419   | 1       |
| Tuscany Montarbu-Telti Usinavà     | 126.9677  | 0.2677  |
| Tuscany Montes-Telti Usinavà       | 61.9355   | 1       |
| Tuscany Uatzo-Telti Usinavà        | -112.3226 | 0.7372  |
| Tuscany Usinavà -Telti Usinavà     | -49       | 1       |
| Tuscany Montes-Tuscany Montarbu    | -65.0323  | 1       |
| Tuscany Uatzo-Tuscany Montarbu     | -239.2903 | 0***    |
| Tuscany Usinavà -Tuscany Montarbu  | -175.9677 | 0.0035* |
| Tuscany Uatzo-Tuscany Montes       | -174.2581 | 0.0042* |
| Tuscany Usinavà -Tuscany Montes    | -110.9355 | 0.7863  |
| Tuscany Usinavà -Tuscany Uatzo     | 63.3226   | 1       |

**Table S4.** Results of Kruskal wallis for resilience components among the sites, provenances and among the provenances in sites (Sites × Provenances).

| RESISTANCE  |            |    |               |
|-------------|------------|----|---------------|
|             | Chi-quared | Df | p-value       |
| Sites       | 69.547     | 3  | 5.336e-15 *** |
| Provenances | 2.0993     | 4  | 0.7175        |

|                     |         |    |               |
|---------------------|---------|----|---------------|
| Sites × Provenances | 82.97   | 19 | 5.69e-10 ***  |
| RESILIENCE          |         |    |               |
| Sites               | 14.64   | 3  | 0.002151 ***  |
| Provenances         | 0.46666 | 4  | 0.9767        |
| Sites × Provenances | 43.241  | 19 | 0.001201 ***  |
| RECOVERY            |         |    |               |
| Sites               | 66.195  | 3  | 2.784e-14 *** |
| Provenances         | 3.2821  | 4  | 0.5118        |
| Sites × Provenances | 82.663  | 19 | 6.436e-10 *** |

**Table S5.** Conover test results for the resilience components among the sites.

|                   |                |          |
|-------------------|----------------|----------|
| RESISTANCE        |                |          |
|                   | mean rank diff | pval     |
| Montes-Montarbu   | 12.9829        | 0.1007   |
| Uatzo-Montarbu    | -22.9906       | 0.0245*  |
| Usinavà-Montarbu  | -66.9406       | 0***     |
| Uatzo-Montes      | -35.9735       | 2e-04*** |
| Usinavà-Montes    | -79.9235       | 0***     |
| Usinavà-Uatzo     | -43.95         | 0***     |
| RESILIENCE        |                |          |
| Montes-Montarbu   | -17.0718       | 0.2468   |
| Uatzo-Montarbu    | 7.3174         | 0.517    |
| Usinavà-Montarbu  | -31.5215       | 0.0103*  |
| Uatzo-Montes      | 24.3892        | 0.1146   |
| Usinavà-Montes    | -14.4497       | 0.2863   |
| Usinavà-Uatzo     | -38.8389       | 0.0045** |
| RECOVERY          |                |          |
| Montes-Montarbu   | -33.8184       | 1e-04*** |
| Uatzo-Montarbu    | 29.7688        | 0.003**  |
| Usinavà -Montarbu | 43.9077        | 0***     |
| Uatzo-Montes      | 63.5873        | 0***     |
| Usinavà -Montes   | 77.7261        | 0***     |
| Usinavà -Uatzo    | 14.1389        | 0.129    |

**Table S6.** Conover test results for provenances in different sites for resistance index.

|                                   |                |        |
|-----------------------------------|----------------|--------|
| source                            | mean rank diff | pval   |
| Corsica Montes-Corsica Montarbu   | 45.2102        | 1      |
| Corsica Uatzo-Corsica Montarbu    | -8.7625        | 1      |
| Corsica Usinavà -Corsica Montarbu | -66.7847       | 0.0608 |

---

|                                    |           |          |
|------------------------------------|-----------|----------|
| Limbara Montarbu-Corsica Montarbu  | 38.2708   | 1        |
| Limbara Montes-Corsica Montarbu    | 24.3375   | 1        |
| Limbara Uatzo-Corsica Montarbu     | -14.1458  | 1        |
| Limbara Usinavà -Corsica Montarbu  | -32.5125  | 1        |
| Portugal Montarbu-Corsica Montarbu | 14.9875   | 1        |
| Portugal Montes-Corsica Montarbu   | 33.4375   | 1        |
| Portugal Uatzo-Corsica Montarbu    | 25.1875   | 1        |
| Portugal Usinavà -Corsica Montarbu | -60.5069  | 0.1863   |
| Telti Montarbu-Corsica Montarbu    | 17.0375   | 1        |
| Telti Montes-Corsica Montarbu      | 5.9375    | 1        |
| Telti Uatzo-Corsica Montarbu       | -16.4625  | 1        |
| Telti Usinavà -Corsica Montarbu    | -36.2847  | 1        |
| Tuscany Montarbu-Corsica Montarbu  | 21.2708   | 1        |
| Tuscany Montes-Corsica Montarbu    | 47.6875   | 1        |
| Tuscany Uatzo-Corsica Montarbu     | -9.2292   | 1        |
| Tuscany Usinavà -Corsica Montarbu  | -47.1875  | 1        |
| Corsica Uatzo-Corsica Montes       | -53.9727  | 0.2019   |
| Corsica Usinavà -Corsica Montes    | -111.9949 | 0***     |
| Limbara Montarbu-Corsica Montes    | -6.9394   | 1        |
| Limbara Montes-Corsica Montes      | -20.8727  | 1        |
| Limbara Uatzo-Corsica Montes       | -59.3561  | 0.3414   |
| Limbara Usinavà -Corsica Montes    | -77.7227  | 0.001*** |
| Portugal Montarbu-Corsica Montes   | -30.2227  | 1        |
| Portugal Montes-Corsica Montes     | -11.7727  | 1        |
| Portugal Uatzo-Corsica Montes      | -20.0227  | 1        |
| Portugal Usinavà -Corsica Montes   | -105.7172 | 0***     |
| Telti Montarbu-Corsica Montes      | -28.1727  | 1        |
| Telti Montes-Corsica Montes        | -39.2727  | 1        |
| Telti Uatzo-Corsica Montes         | -61.6727  | 0.4148   |
| Telti Usinavà -Corsica Montes      | -81.4949  | 7e-04*** |
| Tuscany Montarbu-Corsica Montes    | -23.9394  | 1        |
| Tuscany Montes-Corsica Montes      | 2.4773    | 1        |
| Tuscany Uatzo-Corsica Montes       | -54.4394  | 1        |
| Tuscany Usinavà -Corsica Montes    | -92.3977  | 1e-04*** |
| Corsica Usinavà -Corsica Uatzo     | -58.0222  | 0.1618   |
| Limbara Montarbu-Corsica Uatzo     | 47.0333   | 1        |
| Limbara Montes-Corsica Uatzo       | 33.1      | 1        |
| Limbara Uatzo-Corsica Uatzo        | -5.3833   | 1        |
| Limbara Usinavà -Corsica Uatzo     | -23.75    | 1        |
| Portugal Montarbu-Corsica Uatzo    | 23.75     | 1        |
| Portugal Montes-Corsica Uatzo      | 42.2      | 1        |
| Portugal Uatzo-Corsica Uatzo       | 33.95     | 1        |

---



---

|                                    |          |          |
|------------------------------------|----------|----------|
| Portugal Usinavà -Corsica Uatzo    | -51.7444 | 0.4741   |
| Telti Montarbu-Corsica Uatzo       | 25.8     | 1        |
| Telti Montes-Corsica Uatzo         | 14.7     | 1        |
| Telti Uatzo-Corsica Uatzo          | -7.7     | 1        |
| Telti Usinavà -Corsica Uatzo       | -27.5222 | 1        |
| Tuscany Montarbu-Corsica Uatzo     | 30.0333  | 1        |
| Tuscany Montes-Corsica Uatzo       | 56.45    | 0.1618   |
| Tuscany Uatzo-Corsica Uatzo        | -0.4667  | 1        |
| Tuscany Usinavà -Corsica Uatzo     | -38.425  | 1        |
| Limbara Montarbu-Corsica Usinavà   | 105.0556 | 0***     |
| Limbara Montes-Corsica Usinavà     | 91.1222  | 1e-04*** |
| Limbara Uatzo-Corsica Usinavà      | 52.6389  | 1        |
| Limbara Usinavà -Corsica Usinavà   | 34.2722  | 1        |
| Portugal Montarbu-Corsica Usinavà  | 81.7722  | 0.001*** |
| Portugal Montes-Corsica Usinavà    | 100.2222 | 0***     |
| Portugal Uatzo-Corsica Usinavà     | 91.9722  | 0.0015** |
| Portugal Usinavà -Corsica Usinavà  | 6.2778   | 1        |
| Telti Montarbu-Corsica Usinavà     | 83.8222  | 6e-04*** |
| Telti Montes-Corsica Usinavà       | 72.7222  | 0.0081** |
| Telti Uatzo-Corsica Usinavà        | 50.3222  | 1        |
| Telti Usinavà -Corsica Usinavà     | 30.5     | 1        |
| Tuscany Montarbu-Corsica Usinavà   | 88.0556  | 4e-04*** |
| Tuscany Montes-Corsica Usinavà     | 114.4722 | 0***     |
| Tuscany Uatzo-Corsica Usinavà      | 57.5556  | 1        |
| Tuscany Usinavà -Corsica Usinavà   | 19.5972  | 1        |
| Limbara Montes-Limbara Montarbu    | -13.9333 | 1        |
| Limbara Uatzo-Limbara Montarbu     | -52.4167 | 1        |
| Limbara Usinavà -Limbara Montarbu  | -70.7833 | 0.0124*  |
| Portugal Montarbu-Limbara Montarbu | -23.2833 | 1        |
| Portugal Montes-Limbara Montarbu   | -4.8333  | 1        |
| Portugal Uatzo-Limbara Montarbu    | -13.0833 | 1        |
| Portugal Usinavà -Limbara Montarbu | -98.7778 | 0***     |
| Telti Montarbu-Limbara Montarbu    | -21.2333 | 1        |
| Telti Montes-Limbara Montarbu      | -32.3333 | 1        |
| Telti Uatzo-Limbara Montarbu       | -54.7333 | 1        |
| Telti Usinavà -Limbara Montarbu    | -74.5556 | 0.0082** |
| Tuscany Montarbu-Limbara Montarbu  | -17      | 1        |
| Tuscany Montes-Limbara Montarbu    | 9.4167   | 1        |
| Tuscany Uatzo-Limbara Montarbu     | -47.5    | 1        |
| Tuscany Usinavà -Limbara Montarbu  | -85.4583 | 0.0013** |
| Limbara Uatzo-Limbara Montes       | -38.4833 | 1        |
| Limbara Usinavà -Limbara Montes    | -56.85   | 0.1512   |

---

---

|                                     |          |          |
|-------------------------------------|----------|----------|
| Portugal Montarbu-Limbara Montes    | -9.35    | 1        |
| Portugal Montes-Limbara Montes      | 9.1      | 1        |
| Portugal Uatzo-Limbara Montes       | 0.85     | 1        |
| Portugal Usinavà -Limbara Montes    | -84.8444 | 5e-04*** |
| Telti Montarbu-Limbara Montes       | -7.3     | 1        |
| Telti Montes-Limbara Montes         | -18.4    | 1        |
| Telti Uatzo-Limbara Montes          | -40.8    | 1        |
| Telti Usinavà -Limbara Montes       | -60.6222 | 0.0993   |
| Tuscany Montarbu-Limbara Montes     | -3.0667  | 1        |
| Tuscany Montes-Limbara Montes       | 23.35    | 1        |
| Tuscany Uatzo-Limbara Montes        | -33.5667 | 1        |
| Tuscany Usinavà -Limbara Montes     | -71.525  | 0.017*   |
| Limbara Usinavà -Limbara Uatzo      | -18.3667 | 1        |
| Portugal Montarbu-Limbara Uatzo     | 29.1333  | 1        |
| Portugal Montes-Limbara Uatzo       | 47.5833  | 1        |
| Portugal Uatzo-Limbara Uatzo        | 39.3333  | 1        |
| Portugal Usinavà -Limbara Uatzo     | -46.3611 | 1        |
| Telti Montarbu-Limbara Uatzo        | 31.1833  | 1        |
| Telti Montes-Limbara Uatzo          | 20.0833  | 1        |
| Telti Uatzo-Limbara Uatzo           | -2.3167  | 1        |
| Telti Usinavà -Limbara Uatzo        | -22.1389 | 1        |
| Tuscany Montarbu-Limbara Uatzo      | 35.4167  | 1        |
| Tuscany Montes-Limbara Uatzo        | 61.8333  | 0.2757   |
| Tuscany Uatzo-Limbara Uatzo         | 4.9167   | 1        |
| Tuscany Usinavà -Limbara Uatzo      | -33.0417 | 1        |
| Portugal Montarbu-Limbara Usinavà   | 47.5     | 0.7602   |
| Portugal Montes-Limbara Usinavà     | 65.95    | 0.0236*  |
| Portugal Uatzo-Limbara Usinavà      | 57.7     | 0.5019   |
| Portugal Usinavà -Limbara Usinavà   | -27.9944 | 1        |
| Telti Montarbu-Limbara Usinavà      | 49.55    | 0.5333   |
| Telti Montes-Limbara Usinavà        | 38.45    | 1        |
| Telti Uatzo-Limbara Usinavà         | 16.05    | 1        |
| Telti Usinavà -Limbara Usinavà      | -3.7722  | 1        |
| Tuscany Montarbu-Limbara Usinavà    | 53.7833  | 0.3414   |
| Tuscany Montes-Limbara Usinavà      | 80.2     | 9e-04*** |
| Tuscany Uatzo-Limbara Usinavà       | 23.2833  | 1        |
| Tuscany Usinavà -Limbara Usinavà    | -14.675  | 1        |
| Portugal Montes-Portugal Montarbu   | 18.45    | 1        |
| Portugal Uatzo-Portugal Montarbu    | 10.2     | 1        |
| Portugal Usinavà -Portugal Montarbu | -75.4944 | 0.0044** |
| Telti Montarbu-Portugal Montarbu    | 2.05     | 1        |
| Telti Montes-Portugal Montarbu      | -9.05    | 1        |

---

|                                    |          |          |
|------------------------------------|----------|----------|
| Telti Uatzo-Portugal Montarbu      | -31.45   | 1        |
| Telti Usinavà -Portugal Montarbu   | -51.2722 | 0.504    |
| Tuscany Montarbu-Portugal Montarbu | 6.2833   | 1        |
| Tuscany Montes-Portugal Montarbu   | 32.7     | 1        |
| Tuscany Uatzo-Portugal Montarbu    | -24.2167 | 1        |
| Tuscany Usinavà -Portugal Montarbu | -62.175  | 0.1067   |
| Portugal Uatzo-Portugal Montes     | -8.25    | 1        |
| Portugal Usinavà -Portugal Montes  | -93.9444 | 0***     |
| Telti Montarbu-Portugal Montes     | -16.4    | 1        |
| Telti Montes-Portugal Montes       | -27.5    | 1        |
| Telti Uatzo-Portugal Montes        | -49.9    | 1        |
| Telti Usinavà -Portugal Montes     | -69.7222 | 0.0156*  |
| Tuscany Montarbu-Portugal Montes   | -12.1667 | 1        |
| Tuscany Montes-Portugal Montes     | 14.25    | 1        |
| Tuscany Uatzo-Portugal Montes      | -42.6667 | 1        |
| Tuscany Usinavà -Portugal Montes   | -80.625  | 0.0024** |
| Portugal Usinavà -Portugal Uatzo   | -85.6944 | 0.0052** |
| Telti Montarbu-Portugal Uatzo      | -8.15    | 1        |
| Telti Montes-Portugal Uatzo        | -19.25   | 1        |
| Telti Uatzo-Portugal Uatzo         | -41.65   | 1        |
| Telti Usinavà -Portugal Uatzo      | -61.4722 | 0.3481   |
| Tuscany Montarbu-Portugal Uatzo    | -3.9167  | 1        |
| Tuscany Montes-Portugal Uatzo      | 22.5     | 1        |
| Tuscany Uatzo-Portugal Uatzo       | -34.4167 | 1        |
| Tuscany Usinavà -Portugal Uatzo    | -72.375  | 0.0826   |
| Telti Montarbu-Portugal Usinavà    | 77.5444  | 0.0027** |
| Telti Montes-Portugal Usinavà      | 66.4444  | 0.031*   |
| Telti Uatzo-Portugal Usinavà       | 44.0444  | 1        |
| Telti Usinavà -Portugal Usinavà    | 24.2222  | 1        |
| Tuscany Montarbu-Portugal Usinavà  | 81.7778  | 0.0016** |
| Tuscany Montes-Portugal Usinavà    | 108.1944 | 0***     |
| Tuscany Uatzo-Portugal Usinavà     | 51.2778  | 1        |
| Tuscany Usinavà -Portugal Usinavà  | 13.3194  | 1        |
| Telti Montes-Telti Montarbu        | -11.1    | 1        |
| Telti Uatzo-Telti Montarbu         | -33.5    | 1        |
| Telti Usinavà -Telti Montarbu      | -53.3222 | 0.3628   |
| Tuscany Montarbu-Telti Montarbu    | 4.2333   | 1        |
| Tuscany Montes-Telti Montarbu      | 30.65    | 1        |
| Tuscany Uatzo-Telti Montarbu       | -26.2667 | 1        |
| Tuscany Usinavà -Telti Montarbu    | -64.225  | 0.0731   |
| Telti Uatzo-Telti Montes           | -22.4    | 1        |
| Telti Usinavà -Telti Montes        | -42.2222 | 1        |

|                                   |          |          |
|-----------------------------------|----------|----------|
| Tuscany Montarbu-Telti Montes     | 15.3333  | 1        |
| Tuscany Montes-Telti Montes       | 41.75    | 1        |
| Tuscany Uatzo-Telti Montes        | -15.1667 | 1        |
| Tuscany Usinavà -Telti Montes     | -53.125  | 0.495    |
| Telti Usinavà -Telti Uatzo        | -19.8222 | 1        |
| Tuscany Montarbu-Telti Uatzo      | 37.7333  | 1        |
| Tuscany Montes-Telti Uatzo        | 64.15    | 0.3414   |
| Tuscany Uatzo-Telti Uatzo         | 7.2333   | 1        |
| Tuscany Usinavà -Telti Uatzo      | -30.725  | 1        |
| Tuscany Montarbu-Telti Usinavà    | 57.5556  | 0.227    |
| Tuscany Montes-Telti Usinavà      | 83.9722  | 6e-04*** |
| Tuscany Uatzo-Telti Usinavà       | 27.0556  | 1        |
| Tuscany Usinavà -Telti Usinavà    | -10.9028 | 1        |
| Tuscany Montes-Tuscany Montarbu   | 26.4167  | 1        |
| Tuscany Uatzo-Tuscany Montarbu    | -30.5    | 1        |
| Tuscany Usinavà -Tuscany Montarbu | -68.4583 | 0.0441*  |
| Tuscany Uatzo-Tuscany Montes      | -56.9167 | 1        |
| Tuscany Usinavà -Tuscany Montes   | -94.875  | 1e-04*** |
| Tuscany Usinavà -Tuscany Uatzo    | -37.9583 | 1        |

**Table S7.** Conover test results for recovery index among the provenances in different sites.

| source                             | mean rank diff | pval   |
|------------------------------------|----------------|--------|
| Corsica Montes-Corsica Montarbu    | -24.6477       | 1      |
| Corsica Uatzo-Corsica Montarbu     | 25.025         | 1      |
| Corsica Usinavà -Corsica Montarbu  | 67.2917        | 0.0556 |
| Limbara Montarbu-Corsica Montarbu  | -4.8194        | 1      |
| Limbara Montes-Corsica Montarbu    | -39.525        | 1      |
| Limbara Uatzo-Corsica Montarbu     | 16.4583        | 1      |
| Limbara Usinavà -Corsica Montarbu  | 45.275         | 1      |
| Portugal Montarbu-Corsica Montarbu | 26.525         | 1      |
| Portugal Montes-Corsica Montarbu   | -51.925        | 0.6019 |
| Portugal Uatzo-Corsica Montarbu    | 56.2083        | 0.8678 |
| Portugal Usinavà -Corsica Montarbu | 42.0694        | 1      |
| Telti Montarbu-Corsica Montarbu    | 7.775          | 1      |
| Telti Montes-Corsica Montarbu      | -14.225        | 1      |
| Telti Uatzo-Corsica Montarbu       | 10.925         | 1      |
| Telti Usinavà -Corsica Montarbu    | 47.6806        | 1      |
| Tuscany Montarbu-Corsica Montarbu  | -23.2083       | 1      |
| Tuscany Montes-Corsica Montarbu    | -29.625        | 1      |
| Tuscany Uatzo-Corsica Montarbu     | 70.4583        | 0.8678 |
| Tuscany Usinavà -Corsica Montarbu  | 24.8125        | 1      |

---

|                                   |           |          |
|-----------------------------------|-----------|----------|
| Corsica Uatzo-Corsica Montes      | 49.6727   | 0.4384   |
| Corsica Usinavà -Corsica Montes   | 91.9394   | 0***     |
| Limbara Montarbu-Corsica Montes   | 19.8283   | 1        |
| Limbara Montes-Corsica Montes     | -14.8773  | 1        |
| Limbara Uatzo-Corsica Montes      | 41.1061   | 1        |
| Limbara Usinavà -Corsica Montes   | 69.9227   | 0.0071** |
| Portugal Montarbu-Corsica Montes  | 51.1727   | 0.34     |
| Portugal Montes-Corsica Montes    | -27.2773  | 1        |
| Portugal Uatzo-Corsica Montes     | 80.8561   | 0.0076** |
| Portugal Usinavà -Corsica Montes  | 66.7172   | 0.022*   |
| Telti Montarbu-Corsica Montes     | 32.4227   | 1        |
| Telti Montes-Corsica Montes       | 10.4227   | 1        |
| Telti Uatzo-Corsica Montes        | 35.5727   | 1        |
| Telti Usinavà -Corsica Montes     | 72.3283   | 0.0065** |
| Tuscany Montarbu-Corsica Montes   | 1.4394    | 1        |
| Tuscany Montes-Corsica Montes     | -4.9773   | 1        |
| Tuscany Uatzo-Corsica Montes      | 95.1061   | 0.0275*  |
| Tuscany Usinavà -Corsica Montes   | 49.4602   | 0.7403   |
| Corsica Usinavà -Corsica Uatzo    | 42.2667   | 1        |
| Limbara Montarbu-Corsica Uatzo    | -29.8444  | 1        |
| Limbara Montes-Corsica Uatzo      | -64.55    | 0.0322*  |
| Limbara Uatzo-Corsica Uatzo       | -8.5667   | 1        |
| Limbara Usinavà -Corsica Uatzo    | 20.25     | 1        |
| Portugal Montarbu-Corsica Uatzo   | 1.5       | 1        |
| Portugal Montes-Corsica Uatzo     | -76.95    | 0.002**  |
| Portugal Uatzo-Corsica Uatzo      | 31.1833   | 1        |
| Portugal Usinavà -Corsica Uatzo   | 17.0444   | 1        |
| Telti Montarbu-Corsica Uatzo      | -17.25    | 1        |
| Telti Montes-Corsica Uatzo        | -39.25    | 1        |
| Telti Uatzo-Corsica Uatzo         | -14.1     | 1        |
| Telti Usinavà -Corsica Uatzo      | 22.6556   | 1        |
| Tuscany Montarbu-Corsica Uatzo    | -48.2333  | 0.8164   |
| Tuscany Montes-Corsica Uatzo      | -54.65    | 0.2227   |
| Tuscany Uatzo-Corsica Uatzo       | 45.4333   | 1        |
| Tuscany Usinavà -Corsica Uatzo    | -0.2125   | 1        |
| Limbara Montarbu-Corsica Usinavà  | -72.1111  | 0.0144*  |
| Limbara Montes-Corsica Usinavà    | -106.8167 | 0***     |
| Limbara Uatzo-Corsica Usinavà     | -50.8333  | 1        |
| Limbara Usinavà -Corsica Usinavà  | -22.0167  | 1        |
| Portugal Montarbu-Corsica Usinavà | -40.7667  | 1        |
| Portugal Montes-Corsica Usinavà   | -119.2167 | 0***     |
| Portugal Uatzo-Corsica Usinavà    | -11.0833  | 1        |

---

---

|                                    |          |          |
|------------------------------------|----------|----------|
| Portugal Usinavà -Corsica Usinavà  | -25.2222 | 1        |
| Telti Montarbu-Corsica Usinavà     | -59.5167 | 0.1202   |
| Telti Montes-Corsica Usinavà       | -81.5167 | 0.0011** |
| Telti Uatzo-Corsica Usinavà        | -56.3667 | 1        |
| Telti Usinavà -Corsica Usinavà     | -19.6111 | 1        |
| Tuscany Montarbu-Corsica Usinavà   | -90.5    | 2e-04*** |
| Tuscany Montes-Corsica Usinavà     | -96.9167 | 0***     |
| Tuscany Uatzo-Corsica Usinavà      | 3.1667   | 1        |
| Tuscany Usinavà -Corsica Usinavà   | -42.4792 | 1        |
| Limbara Montes-Limbara Montarbu    | -34.7056 | 1        |
| Limbara Uatzo-Limbara Montarbu     | 21.2778  | 1        |
| Limbara Usinavà -Limbara Montarbu  | 50.0944  | 0.6186   |
| Portugal Montarbu-Limbara Montarbu | 31.3444  | 1        |
| Portugal Montes-Limbara Montarbu   | -47.1056 | 0.9612   |
| Portugal Uatzo-Limbara Montarbu    | 61.0278  | 0.3769   |
| Portugal Usinavà -Limbara Montarbu | 46.8889  | 1        |
| Telti Montarbu-Limbara Montarbu    | 12.5944  | 1        |
| Telti Montes-Limbara Montarbu      | -9.4056  | 1        |
| Telti Uatzo-Limbara Montarbu       | 15.7444  | 1        |
| Telti Usinavà -Limbara Montarbu    | 52.5     | 0.521    |
| Tuscany Montarbu-Limbara Montarbu  | -18.3889 | 1        |
| Tuscany Montes-Limbara Montarbu    | -24.8056 | 1        |
| Tuscany Uatzo-Limbara Montarbu     | 75.2778  | 0.4633   |
| Tuscany Usinavà -Limbara Montarbu  | 29.6319  | 1        |
| Limbara Uatzo-Limbara Montes       | 55.9833  | 0.6445   |
| Limbara Usinavà -Limbara Montes    | 84.8     | 3e-04*** |
| Portugal Montarbu-Limbara Montes   | 66.05    | 0.0235*  |
| Portugal Montes-Limbara Montes     | -12.4    | 1        |
| Portugal Uatzo-Limbara Montes      | 95.7333  | 5e-04*** |
| Portugal Usinavà -Limbara Montes   | 81.5944  | 0.0011** |
| Telti Montarbu-Limbara Montes      | 47.3     | 0.7742   |
| Telti Montes-Limbara Montes        | 25.3     | 1        |
| Telti Uatzo-Limbara Montes         | 50.45    | 1        |
| Telti Usinavà -Limbara Montes      | 87.2056  | 3e-04*** |
| Tuscany Montarbu-Limbara Montes    | 16.3167  | 1        |
| Tuscany Montes-Limbara Montes      | 9.9      | 1        |
| Tuscany Uatzo-Limbara Montes       | 109.9833 | 0.0034** |
| Tuscany Usinavà -Limbara Montes    | 64.3375  | 0.0712   |
| Limbara Usinavà -Limbara Uatzo     | 28.8167  | 1        |
| Portugal Montarbu-Limbara Uatzo    | 10.0667  | 1        |
| Portugal Montes-Limbara Uatzo      | -68.3833 | 0.0932   |
| Portugal Uatzo-Limbara Uatzo       | 39.75    | 1        |

---

---

|                                     |          |          |
|-------------------------------------|----------|----------|
| Portugal Usinavà -Limbara Uatzo     | 25.6111  | 1        |
| Telti Montarbu-Limbara Uatzo        | -8.6833  | 1        |
| Telti Montes-Limbara Uatzo          | -30.6833 | 1        |
| Telti Uatzo-Limbara Uatzo           | -5.5333  | 1        |
| Telti Usinavà -Limbara Uatzo        | 31.2222  | 1        |
| Tuscany Montarbu-Limbara Uatzo      | -39.6667 | 1        |
| Tuscany Montes-Limbara Uatzo        | -46.0833 | 1        |
| Tuscany Uatzo-Limbara Uatzo         | 54       | 1        |
| Tuscany Usinavà -Limbara Uatzo      | 8.3542   | 1        |
| Portugal Montarbu-Limbara Usinavà   | -18.75   | 1        |
| Portugal Montes-Limbara Usinavà     | -97.2    | 0***     |
| Portugal Uatzo-Limbara Usinavà      | 10.9333  | 1        |
| Portugal Usinavà -Limbara Usinavà   | -3.2056  | 1        |
| Telti Montarbu-Limbara Usinavà      | -37.5    | 1        |
| Telti Montes-Limbara Usinavà        | -59.5    | 0.0886   |
| Telti Uatzo-Limbara Usinavà         | -34.35   | 1        |
| Telti Usinavà -Limbara Usinavà      | 2.4056   | 1        |
| Tuscany Montarbu-Limbara Usinavà    | -68.4833 | 0.0208*  |
| Tuscany Montes-Limbara Usinavà      | -74.9    | 0.0033** |
| Tuscany Uatzo-Limbara Usinavà       | 25.1833  | 1        |
| Tuscany Usinavà -Limbara Usinavà    | -20.4625 | 1        |
| Portugal Montes-Portugal Montarbu   | -78.45   | 0.0014** |
| Portugal Uatzo-Portugal Montarbu    | 29.6833  | 1        |
| Portugal Usinavà -Portugal Montarbu | 15.5444  | 1        |
| Telti Montarbu-Portugal Montarbu    | -18.75   | 1        |
| Telti Montes-Portugal Montarbu      | -40.75   | 1        |
| Telti Uatzo-Portugal Montarbu       | -15.6    | 1        |
| Telti Usinavà -Portugal Montarbu    | 21.1556  | 1        |
| Tuscany Montarbu-Portugal Montarbu  | -49.7333 | 0.6483   |
| Tuscany Montes-Portugal Montarbu    | -56.15   | 0.1688   |
| Tuscany Uatzo-Portugal Montarbu     | 43.9333  | 1        |
| Tuscany Usinavà -Portugal Montarbu  | -1.7125  | 1        |
| Portugal Uatzo-Portugal Montes      | 108.1333 | 0***     |
| Portugal Usinavà -Portugal Montes   | 93.9944  | 0***     |
| Telti Montarbu-Portugal Montes      | 59.7     | 0.0857   |
| Telti Montes-Portugal Montes        | 37.7     | 1        |
| Telti Uatzo-Portugal Montes         | 62.85    | 0.4072   |
| Telti Usinavà -Portugal Montes      | 99.6056  | 0***     |
| Tuscany Montarbu-Portugal Montes    | 28.7167  | 1        |
| Tuscany Montes-Portugal Montes      | 22.3     | 1        |
| Tuscany Uatzo-Portugal Montes       | 122.3833 | 4e-04*** |
| Tuscany Usinavà -Portugal Montes    | 76.7375  | 0.006**  |

---

---

|                                   |          |          |
|-----------------------------------|----------|----------|
| Portugal Usinavà -Portugal Uatzo  | -14.1389 | 1        |
| Telti Montarbu-Portugal Uatzo     | -48.4333 | 1        |
| Telti Montes-Portugal Uatzo       | -70.4333 | 0.0668   |
| Telti Uatzo-Portugal Uatzo        | -45.2833 | 1        |
| Telti Usinavà -Portugal Uatzo     | -8.5278  | 1        |
| Tuscany Montarbu-Portugal Uatzo   | -79.4167 | 0.0179*  |
| Tuscany Montes-Portugal Uatzo     | -85.8333 | 0.0037** |
| Tuscany Uatzo-Portugal Uatzo      | 14.25    | 1        |
| Tuscany Usinavà -Portugal Uatzo   | -31.3958 | 1        |
| Telti Montarbu-Portugal Usinavà   | -34.2944 | 1        |
| Telti Montes-Portugal Usinavà     | -56.2944 | 0.2182   |
| Telti Uatzo-Portugal Usinavà      | -31.1444 | 1        |
| Telti Usinavà -Portugal Usinavà   | 5.6111   | 1        |
| Tuscany Montarbu-Portugal Usinavà | -65.2778 | 0.0556   |
| Tuscany Montes-Portugal Usinavà   | -71.6944 | 0.0106*  |
| Tuscany Uatzo-Portugal Usinavà    | 28.3889  | 1        |
| Tuscany Usinavà -Portugal Usinavà | -17.2569 | 1        |
| Telti Montes-Telti Montarbu       | -22      | 1        |
| Telti Uatzo-Telti Montarbu        | 3.15     | 1        |
| Telti Usinavà -Telti Montarbu     | 39.9056  | 1        |
| Tuscany Montarbu-Telti Montarbu   | -30.9833 | 1        |
| Tuscany Montes-Telti Montarbu     | -37.4    | 1        |
| Tuscany Uatzo-Telti Montarbu      | 62.6833  | 1        |
| Tuscany Usinavà -Telti Montarbu   | 17.0375  | 1        |
| Telti Uatzo-Telti Montes          | 25.15    | 1        |
| Telti Usinavà -Telti Montes       | 61.9056  | 0.0769   |
| Tuscany Montarbu-Telti Montes     | -8.9833  | 1        |
| Tuscany Montes-Telti Montes       | -15.4    | 1        |
| Tuscany Uatzo-Telti Montes        | 84.6833  | 0.1293   |
| Tuscany Usinavà -Telti Montes     | 39.0375  | 1        |
| Telti Usinavà -Telti Uatzo        | 36.7556  | 1        |
| Tuscany Montarbu-Telti Uatzo      | -34.1333 | 1        |
| Tuscany Montes-Telti Uatzo        | -40.55   | 1        |
| Tuscany Uatzo-Telti Uatzo         | 59.5333  | 1        |
| Tuscany Usinavà -Telti Uatzo      | 13.8875  | 1        |
| Tuscany Montarbu-Telti Usinavà    | -70.8889 | 0.0183*  |
| Tuscany Montes-Telti Usinavà      | -77.3056 | 0.0031** |
| Tuscany Uatzo-Telti Usinavà       | 22.7778  | 1        |
| Tuscany Usinavà -Telti Usinavà    | -22.8681 | 1        |
| Tuscany Montes-Tuscany Montarbu   | -6.4167  | 1        |
| Tuscany Uatzo-Tuscany Montarbu    | 93.6667  | 0.0463*  |
| Tuscany Usinavà -Tuscany Montarbu | 48.0208  | 1        |

---



|                                 |          |         |
|---------------------------------|----------|---------|
| Tuscany Uatzo-Tuscany Montes    | 100.0833 | 0.0157* |
| Tuscany Usinavà -Tuscany Montes | 54.4375  | 0.4072  |
| Tuscany Usinavà -Tuscany Uatzo  | -45.6458 | 1       |

**Table S8.** Conover test results for the resilience index among the provenances in different sites.

| source                             | mean rank diff | pval   |
|------------------------------------|----------------|--------|
| Corsica Montes-Corsica Montarbu    | 28.3068        | 1      |
| Corsica Uatzo-Corsica Montarbu     | 28.975         | 1      |
| Corsica Usinavà -Corsica Montarbu  | -10.6528       | 1      |
| Limbara Montarbu-Corsica Montarbu  | 38.5139        | 1      |
| Limbara Montes-Corsica Montarbu    | -15.525        | 1      |
| Limbara Uatzo-Corsica Montarbu     | -0.7083        | 1      |
| Limbara Usinavà -Corsica Montarbu  | 6.125          | 1      |
| Portugal Montarbu-Corsica Montarbu | 46.225         | 1      |
| Portugal Montes-Corsica Montarbu   | -14.225        | 1      |
| Portugal Uatzo-Corsica Montarbu    | 62.625         | 1      |
| Portugal Usinavà -Corsica Montarbu | -32.0972       | 1      |
| Telti Montarbu-Corsica Montarbu    | 21.425         | 1      |
| Telti Montes-Corsica Montarbu      | -4.775         | 1      |
| Telti Uatzo-Corsica Montarbu       | -1.075         | 1      |
| Telti Usinavà -Corsica Montarbu    | 8.125          | 1      |
| Tuscany Montarbu-Corsica Montarbu  | -2.9861        | 1      |
| Tuscany Montes-Corsica Montarbu    | 26.775         | 1      |
| Tuscany Uatzo-Corsica Montarbu     | 71.125         | 1      |
| Tuscany Usinavà -Corsica Montarbu  | -24.1875       | 1      |
| Corsica Uatzo-Corsica Montes       | 0.6682         | 1      |
| Corsica Usinavà -Corsica Montes    | -38.9596       | 1      |
| Limbara Montarbu-Corsica Montes    | 10.2071        | 1      |
| Limbara Montes-Corsica Montes      | -43.8318       | 1      |
| Limbara Uatzo-Corsica Montes       | -29.0152       | 1      |
| Limbara Usinavà -Corsica Montes    | -22.1818       | 1      |
| Portugal Montarbu-Corsica Montes   | 17.9182        | 1      |
| Portugal Montes-Corsica Montes     | -42.5318       | 1      |
| Portugal Uatzo-Corsica Montes      | 34.3182        | 1      |
| Portugal Usinavà -Corsica Montes   | -60.404        | 0.6659 |
| Telti Montarbu-Corsica Montes      | -6.8818        | 1      |
| Telti Montes-Corsica Montes        | -33.0818       | 1      |
| Telti Uatzo-Corsica Montes         | -29.3818       | 1      |
| Telti Usinavà -Corsica Montes      | -20.1818       | 1      |
| Tuscany Montarbu-Corsica Montes    | -31.2929       | 1      |

---

|                                    |          |        |
|------------------------------------|----------|--------|
| Tuscany Montes-Corsica Montes      | -1.5318  | 1      |
| Tuscany Uatzo-Corsica Montes       | 42.8182  | 1      |
| Tuscany Usinavà -Corsica Montes    | -52.4943 | 1      |
| Corsica Usinavà -Corsica Uatzo     | -39.6278 | 1      |
| Limbara Montarbu-Corsica Uatzo     | 9.5389   | 1      |
| Limbara Montes-Corsica Uatzo       | -44.5    | 1      |
| Limbara Uatzo-Corsica Uatzo        | -29.6833 | 1      |
| Limbara Usinavà -Corsica Uatzo     | -22.85   | 1      |
| Portugal Montarbu-Corsica Uatzo    | 17.25    | 1      |
| Portugal Montes-Corsica Uatzo      | -43.2    | 1      |
| Portugal Uatzo-Corsica Uatzo       | 33.65    | 1      |
| Portugal Usinavà -Corsica Uatzo    | -61.0722 | 0.7304 |
| Telti Montarbu-Corsica Uatzo       | -7.55    | 1      |
| Telti Montes-Corsica Uatzo         | -33.75   | 1      |
| Telti Uatzo-Corsica Uatzo          | -30.05   | 1      |
| Telti Usinavà -Corsica Uatzo       | -20.85   | 1      |
| Tuscany Montarbu-Corsica Uatzo     | -31.9611 | 1      |
| Tuscany Montes-Corsica Uatzo       | -2.2     | 1      |
| Tuscany Uatzo-Corsica Uatzo        | 42.15    | 1      |
| Tuscany Usinavà -Corsica Uatzo     | -53.1625 | 1      |
| Limbara Montarbu-Corsica Usinavà   | 49.1667  | 1      |
| Limbara Montes-Corsica Usinavà     | -4.8722  | 1      |
| Limbara Uatzo-Corsica Usinavà      | 9.9444   | 1      |
| Limbara Usinavà -Corsica Usinavà   | 16.7778  | 1      |
| Portugal Montarbu-Corsica Usinavà  | 56.8778  | 1      |
| Portugal Montes-Corsica Usinavà    | -3.5722  | 1      |
| Portugal Uatzo-Corsica Usinavà     | 73.2778  | 0.4943 |
| Portugal Usinavà -Corsica Usinavà  | -21.4444 | 1      |
| Telti Montarbu-Corsica Usinavà     | 32.0778  | 1      |
| Telti Montes-Corsica Usinavà       | 5.8778   | 1      |
| Telti Uatzo-Corsica Usinavà        | 9.5778   | 1      |
| Telti Usinavà -Corsica Usinavà     | 18.7778  | 1      |
| Tuscany Montarbu-Corsica Usinavà   | 7.6667   | 1      |
| Tuscany Montes-Corsica Usinavà     | 37.4278  | 1      |
| Tuscany Uatzo-Corsica Usinavà      | 81.7778  | 1      |
| Tuscany Usinavà -Corsica Usinavà   | -13.5347 | 1      |
| Limbara Montes-Limbara Montarbu    | -54.0389 | 1      |
| Limbara Uatzo-Limbara Montarbu     | -39.2222 | 1      |
| Limbara Usinavà -Limbara Montarbu  | -32.3889 | 1      |
| Portugal Montarbu-Limbara Montarbu | 7.7111   | 1      |
| Portugal Montes-Limbara Montarbu   | -52.7389 | 1      |
| Portugal Uatzo-Limbara Montarbu    | 24.1111  | 1      |

---

---

|                                    |          |        |
|------------------------------------|----------|--------|
| Portugal Usinavà -Limbara Montarbu | -70.6111 | 0.2365 |
| Telti Montarbu-Limbara Montarbu    | -17.0889 | 1      |
| Telti Montes-Limbara Montarbu      | -43.2889 | 1      |
| Telti Uatzo-Limbara Montarbu       | -39.5889 | 1      |
| Telti Usinavà -Limbara Montarbu    | -30.3889 | 1      |
| Tuscany Montarbu-Limbara Montarbu  | -41.5    | 1      |
| Tuscany Montes-Limbara Montarbu    | -11.7389 | 1      |
| Tuscany Uatzo-Limbara Montarbu     | 32.6111  | 1      |
| Tuscany Usinavà -Limbara Montarbu  | -62.7014 | 0.9212 |
| Limbara Uatzo-Limbara Montes       | 14.8167  | 1      |
| Limbara Usinavà -Limbara Montes    | 21.65    | 1      |
| Portugal Montarbu-Limbara Montes   | 61.75    | 0.5248 |
| Portugal Montes-Limbara Montes     | 1.3      | 1      |
| Portugal Uatzo-Limbara Montes      | 78.15    | 0.2124 |
| Portugal Usinavà -Limbara Montes   | -16.5722 | 1      |
| Telti Montarbu-Limbara Montes      | 36.95    | 1      |
| Telti Montes-Limbara Montes        | 10.75    | 1      |
| Telti Uatzo-Limbara Montes         | 14.45    | 1      |
| Telti Usinavà -Limbara Montes      | 23.65    | 1      |
| Tuscany Montarbu-Limbara Montes    | 12.5389  | 1      |
| Tuscany Montes-Limbara Montes      | 42.3     | 1      |
| Tuscany Uatzo-Limbara Montes       | 86.65    | 0.7909 |
| Tuscany Usinavà -Limbara Montes    | -8.6625  | 1      |
| Limbara Usinavà -Limbara Uatzo     | 6.8333   | 1      |
| Portugal Montarbu-Limbara Uatzo    | 46.9333  | 1      |
| Portugal Montes-Limbara Uatzo      | -13.5167 | 1      |
| Portugal Uatzo-Limbara Uatzo       | 63.3333  | 1      |
| Portugal Usinavà -Limbara Uatzo    | -31.3889 | 1      |
| Telti Montarbu-Limbara Uatzo       | 22.1333  | 1      |
| Telti Montes-Limbara Uatzo         | -4.0667  | 1      |
| Telti Uatzo-Limbara Uatzo          | -0.3667  | 1      |
| Telti Usinavà -Limbara Uatzo       | 8.8333   | 1      |
| Tuscany Montarbu-Limbara Uatzo     | -2.2778  | 1      |
| Tuscany Montes-Limbara Uatzo       | 27.4833  | 1      |
| Tuscany Uatzo-Limbara Uatzo        | 71.8333  | 1      |
| Tuscany Usinavà -Limbara Uatzo     | -23.4792 | 1      |
| Portugal Montarbu-Limbara Usinavà  | 40.1     | 1      |
| Portugal Montes-Limbara Usinavà    | -20.35   | 1      |
| Portugal Uatzo-Limbara Usinavà     | 56.5     | 1      |
| Portugal Usinavà -Limbara Usinavà  | -38.2222 | 1      |
| Telti Montarbu-Limbara Usinavà     | 15.3     | 1      |
| Telti Montes-Limbara Usinavà       | -10.9    | 1      |

---

---

|                                     |          |         |
|-------------------------------------|----------|---------|
| Telti Uatzo-Limbara Usinavà         | -7.2     | 1       |
| Telti Usinavà -Limbara Usinavà      | 2        | 1       |
| Tuscany Montarbu-Limbara Usinavà    | -9.1111  | 1       |
| Tuscany Montes-Limbara Usinavà      | 20.65    | 1       |
| Tuscany Uatzo-Limbara Usinavà       | 65       | 1       |
| Tuscany Usinavà -Limbara Usinavà    | -30.3125 | 1       |
| Portugal Montes-Portugal Montarbu   | -60.45   | 0.6355  |
| Portugal Uatzo-Portugal Montarbu    | 16.4     | 1       |
| Portugal Usinavà -Portugal Montarbu | -78.3222 | 0.0501  |
| Telti Montarbu-Portugal Montarbu    | -24.8    | 1       |
| Telti Montes-Portugal Montarbu      | -51      | 1       |
| Telti Uatzo-Portugal Montarbu       | -47.3    | 1       |
| Telti Usinavà -Portugal Montarbu    | -38.1    | 1       |
| Tuscany Montarbu-Portugal Montarbu  | -49.2111 | 1       |
| Tuscany Montes-Portugal Montarbu    | -19.45   | 1       |
| Tuscany Uatzo-Portugal Montarbu     | 24.9     | 1       |
| Tuscany Usinavà -Portugal Montarbu  | -70.4125 | 0.2578  |
| Portugal Uatzo-Portugal Montes      | 76.85    | 0.2523  |
| Portugal Usinavà -Portugal Montes   | -17.8722 | 1       |
| Telti Montarbu-Portugal Montes      | 35.65    | 1       |
| Telti Montes-Portugal Montes        | 9.45     | 1       |
| Telti Uatzo-Portugal Montes         | 13.15    | 1       |
| Telti Usinavà -Portugal Montes      | 22.35    | 1       |
| Tuscany Montarbu-Portugal Montes    | 11.2389  | 1       |
| Tuscany Montes-Portugal Montes      | 41       | 1       |
| Tuscany Uatzo-Portugal Montes       | 85.35    | 0.89    |
| Tuscany Usinavà -Portugal Montes    | -9.9625  | 1       |
| Portugal Usinavà -Portugal Uatzo    | -94.7222 | 0.0237* |
| Telti Montarbu-Portugal Uatzo       | -41.2    | 1       |
| Telti Montes-Portugal Uatzo         | -67.4    | 0.846   |
| Telti Uatzo-Portugal Uatzo          | -63.7    | 1       |
| Telti Usinavà -Portugal Uatzo       | -54.5    | 1       |
| Tuscany Montarbu-Portugal Uatzo     | -65.6111 | 1       |
| Tuscany Montes-Portugal Uatzo       | -35.85   | 1       |
| Tuscany Uatzo-Portugal Uatzo        | 8.5      | 1       |
| Tuscany Usinavà -Portugal Uatzo     | -86.8125 | 0.1063  |
| Telti Montarbu-Portugal Usinavà     | 53.5222  | 1       |
| Telti Montes-Portugal Usinavà       | 27.3222  | 1       |
| Telti Uatzo-Portugal Usinavà        | 31.0222  | 1       |
| Telti Usinavà -Portugal Usinavà     | 40.2222  | 1       |
| Tuscany Montarbu-Portugal Usinavà   | 29.1111  | 1       |
| Tuscany Montes-Portugal Usinavà     | 58.8722  | 0.9713  |

---

---

|                                   |          |        |
|-----------------------------------|----------|--------|
| Tuscany Uatzo-Portugal Usinavà    | 103.2222 | 0.1651 |
| Tuscany Usinavà -Portugal Usinavà | 7.9097   | 1      |
| Telti Montes-Telti Montarbu       | -26.2    | 1      |
| Telti Uatzo-Telti Montarbu        | -22.5    | 1      |
| Telti Usinavà -Telti Montarbu     | -13.3    | 1      |
| Tuscany Montarbu-Telti Montarbu   | -24.4111 | 1      |
| Tuscany Montes-Telti Montarbu     | 5.35     | 1      |
| Tuscany Uatzo-Telti Montarbu      | 49.7     | 1      |
| Tuscany Usinavà -Telti Montarbu   | -45.6125 | 1      |
| Telti Uatzo-Telti Montes          | 3.7      | 1      |
| Telti Usinavà -Telti Montes       | 12.9     | 1      |
| Tuscany Montarbu-Telti Montes     | 1.7889   | 1      |
| Tuscany Montes-Telti Montes       | 31.55    | 1      |
| Tuscany Uatzo-Telti Montes        | 75.9     | 1      |
| Tuscany Usinavà -Telti Montes     | -19.4125 | 1      |
| Telti Usinavà -Telti Uatzo        | 9.2      | 1      |
| Tuscany Montarbu-Telti Uatzo      | -1.9111  | 1      |
| Tuscany Montes-Telti Uatzo        | 27.85    | 1      |
| Tuscany Uatzo-Telti Uatzo         | 72.2     | 1      |
| Tuscany Usinavà -Telti Uatzo      | -23.1125 | 1      |
| Tuscany Montarbu-Telti Usinavà    | -11.1111 | 1      |
| Tuscany Montes-Telti Usinavà      | 18.65    | 1      |
| Tuscany Uatzo-Telti Usinavà       | 63       | 1      |
| Tuscany Usinavà -Telti Usinavà    | -32.3125 | 1      |
| Tuscany Montes-Tuscany Montarbu   | 29.7611  | 1      |
| Tuscany Uatzo-Tuscany Montarbu    | 74.1111  | 1      |
| Tuscany Usinavà -Tuscany Montarbu | -21.2014 | 1      |
| Tuscany Uatzo-Tuscany Montes      | 44.35    | 1      |
| Tuscany Usinavà -Tuscany Montes   | -50.9625 | 1      |
| Tuscany Usinavà -Tuscany Uatzo    | -95.3125 | 0.4405 |

---
